# 1 **Prevalence and associated factors of advanced HIV disease** 2 **among ART-naïve and ART-experienced people with HIV at** 3 **AHF-supported sites in Zambia**

4 Webster Chewe<sup>1\*</sup>, Chitalu Chanda<sup>2</sup>, Benson M. Hamooya<sup>3</sup>, Lukundo Siame<sup>3</sup>, Ruth Lindizyani  
5 Mfuné<sup>4</sup>, Mazinga Kayembe<sup>1</sup>, Eric Mpoyi<sup>1</sup>, Nduduzo Dube<sup>5</sup>

6  
7 <sup>1</sup>Medical Department, AIDS Healthcare Foundation, Lusaka, Zambia;

8 <sup>2</sup>Department of Internal Medicine, Ndola Teaching Hospital, Ndola, Zambia

9 <sup>3</sup>School of Medicine and Health Sciences, Mulungushi University, Livingstone, Zambia

10 <sup>4</sup>Department of Public Health, School of Medicine, The Copperbelt University, Ndola, Zambia

11 <sup>5</sup>Africa Bureau, A IDS Healthcare Foundation, Manzini, Eswatini

12  
13 \*[webrychew@gmail.com](mailto:webrychew@gmail.com) (W.C.)

## 14 15 **Abstract**

16 *Background:* Individuals with advanced HIV disease (AHD) have a heightened risk of mortality  
17 despite access to antiretroviral therapy (ART). Sub-Saharan Africa (SSA) has a disproportionate  
18 burden of AHD-associated deaths. However, there is limited country-specific data on AHD's  
19 burden and associated risk factors to help design targeted interventions. Therefore, this study  
20 determined the prevalence and factors associated with AHD among ART-naïve and ART-

21 experienced adults with HIV at five AIDS Healthcare Foundation (AHF)-supported facilities in  
22 Zambia.

23

24 *Methodology:* We conducted a cross-sectional study among 231 ART-naïve and ART-experienced  
25 people living with HIV (PLHIV) and collected demographic and clinical data using a structured  
26 questionnaire. The primary outcome was AHD, defined as a CD4 count less than 200 cells/ $\mu$ L  
27 using the VISITECT® CD4 point-of-care test. Multivariable logistic regression was used to assess  
28 factors associated with AHD.

29

30 *Results:* Among the study participants, 59.7% were female, and 54% were aged 19–35 years. Most  
31 participants were ART-naïve (79.2%), with 85.3% classified in WHO clinical stage 1. The  
32 prevalence of AHD was 47.6% (110/231), significantly higher among ART-naïve participants  
33 [51.9% (95/183)] compared to ART-experienced participants [31.2% (15/48),  $p=0.011$ ]. ART-  
34 naïve participants aged 19–35 years exhibited a notably higher prevalence of AHD (51.6%)  
35 compared to those aged 13-18, 36-45, and >45 years (5.3%, 34.7%, and 8.4%, respectively) and  
36 had significantly higher baseline viral load values (25,000 copies/mL vs. 9,690 copies/mL,  
37  $p=0.037$ ). Additionally, among ART-naïve participants, a significantly higher proportion of  
38 individuals in WHO stages 2, 3, and 4 had AHD compared to those without AHD. Across all  
39 participants, the factors significantly associated with AHD included anemia (adjusted odds ratio  
40 [aOR] 3.03, 95% confidence interval [CI]: 1.15–7.97) and being from the New Masala Clinic  
41 health facility (aOR 3.79, 95% CI: 1.17–12.30)

42

43 *Conclusion:* Advanced HIV disease was prevalent, particularly among ART-naïve individuals, and  
44 it was significantly associated with anemia and health facility location. There is a need for  
45 formulation of interventions, especially among ART-naïve PLHIV who are anemic. Additionally,  
46 studies to integrate point-of-care diagnostics such as the VISITECT® CD4 test into routine HIV  
47 care be conducted in resource-limited settings are warranted for early detection of AHD.

48

49 *Keywords:* AHD, anemia, ART-experienced, ART-naïve, VISITECT® CD4 test, Zambia

50

## 51 **Introduction**

52 Despite over three decades since the onset of the human immunodeficiency virus (HIV) pandemic,  
53 epidemic control remains elusive. Significant morbidity and mortality persist, particularly among  
54 individuals with advanced HIV disease (AHD) [1,2]. According to the World Health Organization  
55 (WHO), AHD is defined as CD4 count below 200 cells/ $\mu$ L or WHO clinical stage 3 or 4 [3,4]. The  
56 "test and treat" strategy has improved survival rates among people living with HIV (PLHIV), and  
57 the rollout of testing in most healthcare facilities has helped reach populations that were previously  
58 underserved [5,6]. As a result, treatment coverage has increased across many regions, with several  
59 countries reporting that over 95% of PLHIV are on antiretroviral therapy (ART) [7,8].  
60 Furthermore, more than 70% of clients who initiate ART have CD4 counts above 200 cells/ $\mu$ L [9].  
61 However, despite increased efforts in HIV screening and treatment, high mortality among PLHIV  
62 remains largely driven by and associated with AHD [10]. AHD is characterized by an increased  
63 vulnerability to malignancies and opportunistic infections such as bacterial infections,  
64 cryptococcal infections, and mycobacterial diseases like *Mycobacterium tuberculosis* and

65 nontuberculous mycobacterium [11]. Additionally, AHD is often associated with anemia and  
66 weight loss [2]. Many PLHIV remain asymptomatic due to the natural progression of HIV  
67 infection, which often masks disease progression and leads to late presentation, especially in those  
68 with AHD [12,13].

69 Newly HIV-diagnosed individuals are among the most likely to present with AHD due to low rates  
70 of elite HIV control in low- and middle-income countries (LMICs) [14]. Without ART, most  
71 PLHIV present with unsuppressed HIV viral loads [15,16]. Furthermore, the risk of AHD is higher  
72 among those who are not on ART or have disengaged from care [17,18]. The prevalence of AHD  
73 is estimated to be 60% among those who have disengaged from care and 43.2% among ART-naïve  
74 PLHIV [19]. While the prevalence of AHD among ART-naïve PLHIV appears to be declining,  
75 there is limited trend analysis available for ART-exposed PLHIV who have access to care [20].  
76 Approximately 60% of PLHIV on ART still have CD4 counts below 200 cells/ $\mu$ L, and this trend  
77 has remained static for years [21]. Disengagement from care continues to be a significant challenge  
78 in LMICs [1].

79 There is limited data on the prevalence and associated factors of AHD among ART-naïve PLHIV  
80 and those ART experienced in SSA information cardinal for policy formulation and in informing  
81 clinical practice. Therefore, this study aimed to estimate the prevalence and factors associated with  
82 AHD among PLHIV who are ART-naïve and ART-experienced in five AIDS Healthcare  
83 Foundation (AHF)-supported health facilities in Zambia.

## 84 **Methods**

### 85 **Study site and study design**

86 A multicenter, cross-sectional study was conducted among individuals with HIV in five health  
87 facilities across Zambia from January 8 to May 31, 2024. The participating sites included AHF  
88 stand-alone ART clinics at Chifundo and Lusungu in Lusaka District, Kapiri Mposhi Urban Clinic  
89 (Kapiri Mposhi District), New Masala Clinic (Ndola District), and Shampande Clinic (Choma  
90 District). These facilities were purposively selected to represent diverse regions across four  
91 provinces of Zambia.

### 92 **Sample size and sampling technique**

93 The sample size of 231 participants was determined based on the available testing resources at the  
94 selected five facilities during the study period. Purposive sampling was employed to include all  
95 patients who met the study's inclusion criteria and were present at the facilities at the time of data  
96 collection.

### 97 **Study Definitions**

98 Advanced HIV disease (AHD) was defined as any person living with HIV who had a CD4 count  
99 of <200 cells/ $\mu$ L or was categorized under WHO clinical stage 3 or 4. HIV status was determined  
100 according to Zambia's national standards [4,22].

101 Antiretroviral therapy (ART) status was classified as either ART-naïve or ART-experienced.  
102 ART-naïve referred to any person living with HIV who had never received ART, while ART-  
103 experienced referred to those who had previously received or were currently receiving ART.

104 Anaemia was defined as a hemoglobin concentration of less than 13.0 g/dL in males and less than  
105 12.0 g/dL in females [23].

106 HIV Viral load was defined as a measure of the amount of HIV RNA (viral particles) in a  
107 participant's blood expressed in copies of the virus per milliliter of blood (copies/mL). Suppressed  
108 HIV viral load was defined as a viral load of fewer than 200 copies/mL. Low-level viremia (LLV)  
109 was defined as a viral load between 200 – 999 copies/mL. Unsuppressed HIV viral load was  
110 defined as a viral load of greater or equal to 1,000 copies/mL [24].

111 Silent transfer was defined as the situation where a person living with HIV presents to a new  
112 healthcare facility with a viral load  $\leq 1000$  RNA copies/mL, without prior formal documentation  
113 or referral from their previous facility [25].

## 114 **Data and sample collection**

115 Baseline data were collected using a structured questionnaire developed and administered by  
116 trained research assistants. The data included demographic (age and sex) and clinical (ART status,  
117 ART regimen, WHO clinical staging, hemoglobin levels, VISITECT® CD4 test, viral load, and  
118 urine LAM test) characteristics. Approximately 8 mL of venous blood was collected from each  
119 consenting participant into an EDTA tube and stored at room temperature until transported to the  
120 designated site laboratory for analysis of hemoglobin levels, CD4 count, and viral load  
121 determination. Blood samples were analyzed within 24 hours, and CD4 cell counts were measured  
122 using the VISITECT® CD4 test according to the manufacturer's specifications.

## 123 **Data analysis plan**

124 Data were cleaned in Microsoft Excel and analyzed using STATA 15. Descriptive statistics were  
125 used to understand the distribution of variables among the study participants. The Shapiro Wilk  
126 test was used to determine the normality of a continuous variable, and since there was no normality,  
127 we used the Wilcoxon rank sum test to ascertain a statistical difference between the two medians.  
128 A relationship between two categorical variables was determined using the Pearson chi-square test  
129 or Fisher's exact test, depending on applicability. Multivariable logistic regression was used to  
130 ascertain factors associated with AHD. Factors in the final model were selected based on the  
131 previous literature. A p-value < 5% was considered statistically significant.

## 132 **Ethics**

133 The study protocol was reviewed and approved by the Tropical Diseases Research Centre (TDRC)  
134 ethics review committee (TRC/C4/12/2023) and The National Health Research Authority  
135 (NHREB006/29/12/2023). Permission was obtained from the provincial, district, and facility in-  
136 charges where the study took place. Written informed consent was obtained from study  
137 participants. Data were collected without personal identifiers, kept secure and confidential and  
138 were applicable, only available to the principal and co-principal investigators.

## 139 **Results**

### 140 **Basic characteristics of the study participants**

141 This study included 231 participants, of whom 59.7% (138/231) were female, and 54% (125/231)  
142 were in the age group of 19-35 years. Most patients were ART-naïve (79.2%, 183/231), while  
143 20.8% (48/231) had prior ART experience. The majority of participants (85.3%, 197/231) were  
144 classified as being in WHO clinical stage 1, and 5.9% (3/51) had positive urine LAM tests.  
145 Additionally, about one-third of the participants were anemic (33.5%, 77/231).

### 146 **The burden of advanced HIV disease in ART-naïve and ART-** 147 **experienced Participants**

148 The overall prevalence of AHD was 47.6% (110/231), higher among ART-naïve participants  
149 (51.9%, 95/183) than ART-experienced participants (31.2%, 15/48),  $p=0.011$ , as shown in Fig 1.



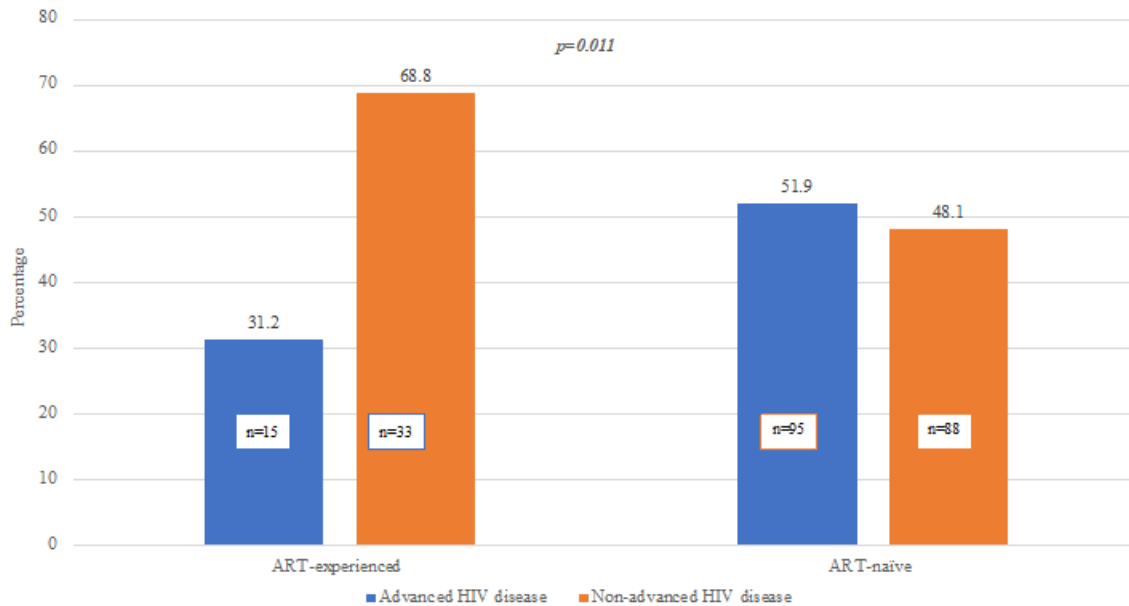

150

151 **Figure 1.** Prevalence of Advanced HIV disease and Non-Advanced HIV disease among ART-  
152 naïve and ART-experienced Participants

### 153 **Relationship between AHD and other study variables**

154 Among ART-naïve participants with AHD, those in the 19–35 age group had a higher prevalence  
155 of AHD (51.6% vs. 5.3%, 34.7%, and 8.4%) and were more likely to be in WHO HIV Clinical  
156 Stage 1 (80% vs. 13.7% and 3.2%). ART-naïve individuals with AHD also had significantly higher  
157 baseline viral load values, 25,000 vs. 9,690,  $p = 0.037$ . In the overall analysis (combining ART-  
158 experienced and ART-naïve participants), those with AHD had higher viral load values at  
159 enrolment compared to those without AHD, 26,950 vs. 5,090,  $p = 0.012$ . Additionally, anemia was  
160 more prevalent in participants with AHD than in those without (41.8% vs. 25.8%,  $p = 0.010$ ), see  
161 Table 1

**Table 1: Demographic and Clinical Factors sorted according to advanced HIV disease among ART Experienced and Naïve Participants**

| Characteristic                  | ART-Experienced (n=48) |           |                  | ART-Naïve (n=183) |           |                 | Overall (n=231) |            |                 |
|---------------------------------|------------------------|-----------|------------------|-------------------|-----------|-----------------|-----------------|------------|-----------------|
|                                 | AHD                    |           | <i>p</i> < value | AHD               |           | <i>p</i> -value | AHD             |            | <i>p</i> -value |
|                                 | Yes (n=15)             | No (n=33) |                  | Yes (n=95)        | No (n=88) |                 | Yes (n=110)     | No (n=121) |                 |
| <b>Age categories in years*</b> |                        |           | 0.482            |                   |           | <b>0.029</b>    |                 |            | 0.277           |
| 13- 18                          | 0 (0.0)                | 3 (9.1)   |                  | 5 (5.3)           | 1 (1.1)   |                 | 5 (4.5)         | 4 (3.3)    |                 |
| 19- 35                          | 6 (40.0)               | 8 (24.2)  |                  | 49 (51.6)         | 62(70.5)  |                 | 55 (50.0)       | 70 (57.9)  |                 |
| 35- 45                          | 6 (40.0)               | 13 (39.4) |                  | 33 (34.7)         | 17 (19.3) |                 | 39 (34.5)       | 30 (34.8)  |                 |
| > 45                            | 3 (20.0)               | 9 (27.3)  |                  | 8 (8.4)           | 8 (8.4)   |                 | 11 (10.0)       | 17 (14.1)  |                 |
| <b>Sex*</b>                     |                        |           | 0.367            |                   |           | 0.623           |                 |            | 0.466           |
| Male                            | 7 (46.7)               | 20 (60.6) |                  | 56 (59.0)         | 55 (62.5) |                 | 63 (57.3)       | 75 (62.0)  |                 |
| Female                          | 8 (53.3)               | 13 (39.4) |                  | 39 (41.1)         | 33 (37.5) |                 | 47 (42.7)       | 46 (38.0)  |                 |
| <b>Facility Name*</b>           |                        |           | 0.960            |                   |           | 0.337           |                 |            | 0.502           |
| Chifundo AHF ART Clinic         | 3 (20.0)               | 6 (18.2)  |                  | 17 (17.9)         | 24 (27.3) |                 | 20 (18.2)       | 30 (24.8)  |                 |
| Kapiri Mposhi Urban Clinic      | 1 (6.7)                | 3 (9.1)   |                  | 23 (24.2)         | 15 (17.1) |                 | 24 (21.8)       | 18 (14.9)  |                 |
| Lusungu AHF ART Clinic          | 3 (20.0)               | 7 (21.2)  |                  | 17 (17.9)         | 13 (14.7) |                 | 20 (18.2)       | 20 (16.5)  |                 |
| New Masala                      | 3 (20.0)               | 9 (27.3)  |                  | 22 (23.2)         | 16 (18.2) |                 | 25 (22.7)       | 25 (20.7)  |                 |

|                                              |                     |                   |       |                      |                 |              |                      |                   |              |
|----------------------------------------------|---------------------|-------------------|-------|----------------------|-----------------|--------------|----------------------|-------------------|--------------|
| Clinic                                       |                     |                   |       |                      |                 |              |                      |                   |              |
| Shampande Clinic                             | 5 (33.3)            | 8 (24.2)          |       | 16 (16.8)            | 20 (22.7)       |              | 21 (19.1)            | 28 (23.1)         |              |
| <b>WHO HIV Clinical Staging*</b>             |                     |                   | 0.587 |                      |                 | <b>0.047</b> |                      |                   | 0.067        |
| 1                                            | 11 (73.3)           | 28 (85.0)         |       | 76 (80.0)            | 82 (93.2)       |              | 87 (79.1)            | 110 (90.9)        |              |
| 2                                            | 2 (13.3)            | 2 (6.0)           |       | 13 (13.7)            | 4 (4.6)         |              | 15 (13.6)            | 6 (4.9)           |              |
| 3                                            | 2 (13.4)            | 2 (6.0)           |       | 3 (3.2)              | 2 (2.3)         |              | 5 (4.6)              | 4 (3.3)           |              |
| 4                                            | 0 (0.0)             | 1 (3.0)           |       | 3 (3.2)              | 0 (0.0)         |              | 3 (2.7)              | 1 (0.8)           |              |
| <b>Urine LAM Results*</b>                    |                     |                   |       |                      |                 | 0.692        |                      |                   | 0.655        |
| Negative                                     |                     |                   |       | 38 (92.7)            | 2 (100.0)       |              | 45 (93.8)            | 3 (100.0)         |              |
| Positive                                     |                     |                   |       | 3 (7.3)              | 0 (0.0)         |              | 3 (6.3)              | 0 (0.0)           |              |
| <b>Viral load at enrolment copies/mL**</b>   | 45100 (308, 271000) | 3830(1190, 54250) | 0.223 | 25000 (7800, 242000) | 9690 (40, 2690) | <b>0.037</b> | 26950 (7200, 242000) | 5090 (123, 26800) | <b>0.012</b> |
| <b>Viral load at enrolment in copies/mL*</b> |                     |                   | 0.223 |                      |                 | 0.26         |                      |                   | 0.137        |
| < 200                                        | 1 (14.3)            | 4 (20.0)          |       | 5 (14.2)             | 10 (28.6)       |              | 6 (14.3)             | 14 (25.5)         |              |
| 200- 999                                     | 1 (14.3)            | 0 (0.0)           |       | 1 (2.9)              | 2 (5.7)         |              | 2 (4.8)              | 2 (3.6)           |              |
| ≥ 1000                                       | 5 (71.4)            | 16 (80.0)         |       | 29 (82.9)            | 23 (65.7)       |              | 34 (81.0)            | 39 (70.9)         |              |
| <b>Presence of Anemia*</b>                   |                     |                   | 0.072 |                      |                 | 0.056        |                      |                   | <b>0.010</b> |

|     |          |           |  |           |           |  |           |           |  |
|-----|----------|-----------|--|-----------|-----------|--|-----------|-----------|--|
| No  | 8 (53.3) | 26 (78.8) |  | 56 (58.9) | 63 (72.4) |  | 64 (58.2) | 89 (74.2) |  |
| Yes | 7 (46.7) | 7 (46.7)  |  | 39 (41.1) | 24 (27.6) |  | 46 (41.8) | 31 (25.8) |  |

\*Data presented as frequency (%)

\*\*Data presented as median (interquartile range)

*Abbreviation:* AHD: advanced HIV disease; AHF: AIDS Healthcare Foundation; ART: Antiretroviral therapy; AZT/3TC/DTG: Zidovudine/Lamivudine/Dolutegravir; LAM:lipoarabinomannan; TLD: Tenofovir/ Lamivudine/Dolutegravir; TLE:Tenofovir/Lamivudine/Efavirenz), TaFED: Tenofovir Alafenamide/Emtricitabine/Dolutegravir); WHO: World Health Organization

162

163 ***Regression Analysis of Factors Associated with AHD among ART-Naïve, ART-Experienced, and Combined Group Participants***

164 Table 2 presents the results of bivariable and multivariable analyses assessing factors associated with AHD. In the overall crude analysis  
 165 (combining ART-experienced and ART-naïve participants), individuals with anemia had 2.06 times higher odds of being diagnosed  
 166 with AHD compared to non-anemic individuals (crude odds ratio [cOR] = 2.06; 95% CI: 1.18–3.60; p = 0.011). Participants with WHO  
 167 clinical stage 2 had 3.16 times higher odds of AHD diagnosis compared to those not in Stage 2 (cOR = 3.16; 95% CI: 1.17–8.49; p =  
 168 0.022). In the adjusted analysis, participants receiving care at New Masala Clinic had significantly higher odds of being diagnosed with  
 169 AHD compared to those from Lusungu clinic (adjusted odds ratio [aOR] = 3.79; 95% CI: 1.17–12.30; p = 0.027). Additionally,  
 170 participants with anemia had 3.03 times higher odds of receiving an AHD diagnosis compared to non-anemic participants (aOR = 3.03;  
 171 95% CI: 1.15–7.97; p = 0.024).

172 In the crude analysis among ART-naïve participants, those from Masala clinic were 4.67 times more likely to be diagnosed with AHD  
 173 compared to those from Lusungu clinic (cOR = 4.67; 95% CI: 1.05–20.74; p = 0.043). Participants with WHO clinical stage 2 had 3.55  
 174 times higher odds of AHD diagnosis compared to those in WHO stage 1 (cOR = 3.55; 95% CI: 1.10–11.38; p = 0.033). In the adjusted

175 analysis, participants from New Masala Clinic had significantly higher odds of being diagnosed with AHD compared to those from  
 176 Lusungu clinic (aOR = 4.67; 95% CI: 1.05–20.73; p = 0.043).

177

**Table 2. Logistic Regression Analysis of Factors Associated with Advanced HIV Disease among ART Experienced and Naïve Participants**

| Variable                       | ART-Experienced (n=48) |         |                   |         | ART-Naïve (n=183) |         |                   |         | Overall (n=231)   |         |                    |         |
|--------------------------------|------------------------|---------|-------------------|---------|-------------------|---------|-------------------|---------|-------------------|---------|--------------------|---------|
|                                | Crude analysis         |         | Adjusted analysis |         | Crude analysis    |         | Adjusted analysis |         | Crude analysis    |         | Adjusted analysis  |         |
|                                | cOR (95% CI)           | p-value | aOR (95% CI)      | p-value | cOR (95% CI)      | p-value | aOR (95% CI)      | p-value | cOR (95% CI)      | p-value | aOR (95% CI)       | p-value |
| <b>Age categories in years</b> |                        |         |                   |         |                   |         |                   |         |                   |         |                    |         |
| 13 - 18                        |                        |         |                   |         | 5.0 (0.47, 52.96) | 0.181   | -                 | -       | 1.93 (0.42, 8.81) | 0.395   | 9.35 (0.77, 112.6) | 0.078   |
| 19 - 35                        | 2.25 (0.41, 12.09)     | 0.345   |                   |         | 0.77 (0.27, 2.21) | 0.663   | 0.71(0.08, 5.83)  | 0.755   | 1.21 (0.52, 2.80) | 0.649   | 1.75 (0.42, 7.21)  | 0.441   |
| 36 - 45                        | 1.38 (0.27,7.04 )      | 0.695   |                   |         | 1.94 (0.62, 6.08) | 0.255   | 0.87(0.08, 5.83)  | 0.908   | 2.00 (0.82, 4.91) | 0.127   | 1.25 (0.28, 5.61)  | 0.770   |
| > 45                           | ref                    |         |                   |         | Ref               |         | Ref               |         | Ref               |         | Ref                |         |
| <b>Sex</b>                     |                        |         |                   |         |                   |         |                   |         |                   |         |                    |         |
| Male                           | Ref                    |         |                   |         | Ref               |         | Ref               |         | Ref               |         | Ref                |         |

|                                             |                    |       |  |  |                    |       |                    |              |                    |       |                    |              |
|---------------------------------------------|--------------------|-------|--|--|--------------------|-------|--------------------|--------------|--------------------|-------|--------------------|--------------|
| Female                                      | 0.57 (0.17, 1.94)  | 0.369 |  |  | 0.84 (0.46, 1.53)  | 0.582 | 0.49 (0.12, 1.95)  | 0.319        | 0.82 (0.48, 1.39)  | 0.466 | 0.68 (0.23, 2.00)  | 0.487        |
| <b>Facility Name</b>                        |                    |       |  |  |                    |       |                    |              |                    |       |                    |              |
| Lusungu AHF ART Clinic                      | Ref                |       |  |  | Ref                |       | Ref                |              | Ref                |       | Ref                |              |
| Chifundo AHF ART Clinic                     | 1.17 (0.16, 8.09)  | 0.876 |  |  | 0.54 (0.20, 1.40)  | 0.207 | -                  | -            | 0.67 (0.28, 1.54)  | 0.344 | -                  | -            |
| Shampande Clinic                            | 1.45 (0.25, 8.42)  | 0.673 |  |  | 0.62 (0.23, 1.62)  | 0.324 | -                  | -            | 0.75 (0.32, 1.73)  | 0.502 | -                  | -            |
| Kapiri Mposhi Urban Clinic                  | 0.77 (0.06, 10.86) | 0.852 |  |  | 1.12 (0.42, 2.98)  | 0.818 | 8.82 (0.88, 88.23) | 0.064        | 1.33 (0.56, 3.18)  | 0.517 | 3.50 (0.74, 16.67) | 0.115        |
| New Masala Clinic                           | 0.78 (0.11, 5.10)  | 0.793 |  |  | 1.04 (0.39, 2.76)  | 0.919 | 4.67(1.05, 20.74)  | <b>0.043</b> | 1.00(0.43, 2.29)   | 1.00  | 3.79 (1.17, 12.30) | <b>0.027</b> |
| <b>Viral load at enrolment in copies/mL</b> |                    |       |  |  |                    |       |                    |              |                    |       |                    |              |
| < 200                                       |                    |       |  |  | Ref                |       | Ref                |              | Ref                |       | Ref                |              |
| 200 - 999                                   |                    |       |  |  | 1.00 (0.07, 13.86) | 1.000 | 0.63 (0.03, 10.36) | 0.749        | 2.33 (0.26, 20.65) | 0.446 | 2.48 (0.21, 28.71) | 0.466        |

|                                                                                                                                                                                                                      |                    |       |  |  |                    |              |                    |       |                    |              |                    |              |
|----------------------------------------------------------------------------------------------------------------------------------------------------------------------------------------------------------------------|--------------------|-------|--|--|--------------------|--------------|--------------------|-------|--------------------|--------------|--------------------|--------------|
| ≥ 1000                                                                                                                                                                                                               |                    |       |  |  | 2.43 (0.72, 8.13)  | 0.148        | 2.12 (0.39, 11.46) | 0.382 | 2.03 (0.70, 5.88)  | 0.190        | 1.91 (0.53, 6.85)  | 0.317        |
| <b>WHO HIV Clinical Staging</b>                                                                                                                                                                                      |                    |       |  |  |                    |              |                    |       |                    |              |                    |              |
| 1                                                                                                                                                                                                                    | Ref                |       |  |  | Ref                |              | Ref                |       | Ref                |              | Ref                |              |
| 2                                                                                                                                                                                                                    | 2.55(0.32, 20.38)  | 0.379 |  |  | 3.55 (1.10, 11.38) | <b>0.033</b> | 2.67 (0.30, 23.76) | 0.379 | 3.16 (1.17, 8.49)  | <b>0.022</b> | 2.97 (0.58, 15.15) | 0.190        |
| 3                                                                                                                                                                                                                    |                    |       |  |  | 1.64 (0.27, 10.08) | 0.593        | -                  | -     | 1.58 (0.41, 6.06)  | 0.505        | 0.07 (0.003, 1.32) | 0.076        |
| 4                                                                                                                                                                                                                    |                    |       |  |  | -                  | -            | -                  | -     | 3.79 (0.38, 37.10) | 0.252        | -                  | -            |
| <b>Presence of Anemia</b>                                                                                                                                                                                            |                    |       |  |  |                    |              |                    |       |                    |              |                    |              |
| No                                                                                                                                                                                                                   | Ref                |       |  |  | Ref                |              | Ref                |       | Ref                |              | Ref                |              |
| Yes                                                                                                                                                                                                                  | 3.25 (0.87, 12.08) | 0.079 |  |  | 1.86 (0.99, 3.47)  | 0.051        | 2.92 (0.90, 9.46)  | 0.073 | 2.06 (1.18, 3.60)  | <b>0.011</b> | 3.03 (1.15, 7.97)  | <b>0.024</b> |
| <i>Abbreviations:</i> AHD: advanced HIV disease; AHF: AIDS Healthcare Foundation; aOR: adjusted odds ratio; ART: antiretroviral therapy; cOR: crude odds ratio; Ref: reference group; WHO: World Health Organization |                    |       |  |  |                    |              |                    |       |                    |              |                    |              |

## 179 **Discussion**

180 The overall prevalence of AHD in our study was 47.6%, with a notably higher prevalence among  
181 ART-naïve individuals (51.9%) compared to ART-experienced individuals (31.2%). This finding  
182 is consistent with studies from other regions, such as South Africa and Sierra Leone, which also  
183 highlight the persistent challenge of AHD despite the availability of ART [11,19]. For instance, a  
184 study in South Africa reported a higher prevalence of AHD among ART-experienced individuals  
185 (58.6%) compared to ART-naïve individuals (43.45%) [19]. Similarly, in Sierra Leone, AHD  
186 prevalence was found to be 58.6% among ART-experienced individuals, higher than the 43.5%  
187 prevalence among ART-naïve youth aged 15-24 years [11]. These findings from South Africa and  
188 Sierra Leone underscore the complexity of AHD management, with ART-experienced individuals  
189 facing significant challenges despite prolonged ART use [9,11,12,19,26,27].

190 This high prevalence, particularly among ART-naïve patients, underscores the need for targeted  
191 community innovations to ensure that The Joint United Nations Programme on HIV and AIDS  
192 (UNAIDS) first 95 target is globally met and that case finding efforts for HIV are comprehensive  
193 [28,29]. The significant burden of AHD among both ART-naïve and ART-experienced patients  
194 could be due to the lack of targeted HIV case finding, particularly in certain age groups, despite  
195 achieving 95% of patients knowing their HIV status and 95% being on ART [30].

196 A notable finding of this study was the significant association between anemia and AHD, as  
197 observed in both ART-naïve and ART-experienced participants. This association is consistent with  
198 existing literature, where anemia is a common comorbidity among PLHIV, particularly those with  
199 advanced immunosuppression [31]. The presence of anemia in this population is multifactorial,  
200 resulting from chronic inflammation, opportunistic infections, and ART-related toxicities [32,33].



201 The study further found that most participants classified in WHO Stage 1 did not have AHD, which  
202 aligns with expected clinical staging outcomes for AHD. In contrast, a higher prevalence of AHD  
203 was observed among participants in WHO stages 2, 3, and 4, indicating that advanced clinical  
204 staging correlates with the CD4-defined criterion for AHD. This alignment supports the validity  
205 of both WHO staging and CD4 counts in identifying individuals with advanced  
206 immunosuppression [34–36]. Additionally, the study identified positive results for tuberculosis  
207 screening even among participants in WHO Stage 1, suggesting that point-of-care diagnostics like  
208 the VISITECT® CD4 test may offer greater sensitivity in detecting AHD. This finding underscores  
209 the potential benefit of integrating rapid diagnostic tools into routine clinical practice to improve  
210 early identification of patients at risk for poor outcomes, thereby supporting more timely  
211 interventions.

212 The 19–35-year age group had a higher proportion of AHD among ART-naïve participants. This  
213 finding aligns with other studies that have reported a higher prevalence of AHD among youths  
214 [11]. The recent Zambia population-based HIV impact assessment (ZAMPHIA) report also  
215 highlights the higher incidence of HIV in this age group, coupled with challenges in accessing  
216 HIV preventive strategies [30]. These findings may reflect differences in health-seeking behaviors,  
217 adherence patterns, or immunological responses among PLWH [37,38]. Therefore, there is a need  
218 for tailored interventions targeting specific demographic groups that could help address these  
219 disparities.

220 The study found no significant association between sex and AHD, indicating that both male and  
221 female patients are equally at risk of presenting with advanced disease, which could be due to the  
222 smaller sample size of our study. This result contrasts with findings from other studies that suggest  
223 female sex may be protective [11,26].

224 Another noteworthy finding was that 14.3% of both ART-naïve and ART-experienced individuals  
225 with a viral load of less than 200 copies/mL presented with AHD. Concurrent AHD and viral load  
226 suppression were observed in 14.3% of ART-experienced and 14.1% of ART-naïve patients. This  
227 phenomenon may be attributed to "HIV elite control" or "silent transfer," where patients achieve  
228 viral suppression despite presenting with AHD [39]. These results were higher than those observed  
229 in the Zimbabwe Population-Based HIV Impact Assessment (ZIMPHIA) study, which reported  
230 13% of patients with concurrent viral load suppression and AHD [40]. Additionally, low-level  
231 viremia, defined as viral loads between 200 and 1000 copies/mL, was associated with AHD,  
232 although this association did not reach statistical significance. While the current study did not find  
233 a significant association between viral load and AHD, further investigation is warranted into the  
234 potential effects of low-level viremia on AHD outcomes. Previous studies have linked low-level  
235 viremia to adverse health outcomes, although the association was not statistically significant in the  
236 present analysis, possibly due to the small sample size [41].

237 The significant burden of AHD and the high prevalence of anemia observed in this study  
238 underscore the need for comprehensive care strategies that extend beyond ART provision [42].  
239 Enhancing AHD screening through point-of-care diagnostics, along with further research on the  
240 impact of managing comorbidities like anemia, is essential to improve AHD outcomes.

## 241 **Study limitations and strengths**

242 The study has several limitations. First, the cross-sectional design limits the ability to establish  
243 causality between observed factors and AHD. Second, the study relied on a small sample size  
244 which may not be representative of the broader population of PLHIV across the country. Third,  
245 the use of novel diagnostic methods for AHD, such as the VISITECT® CD4 Advanced Disease

246 Test could lead to variability in prevalence estimates. Despite the limitations, the study was able  
247 to quantify the burden and factors associated with AHD information valuable for informing policy  
248 and clinical practice.

## 249 **Conclusion**

250 This study underscores the significant burden of AHD among both ART-naïve and ART-  
251 experienced participants at selected AHF-supported facilities in Zambia. The high prevalence of  
252 AHD, particularly among those newly diagnosed, highlights the ongoing challenges in early HIV  
253 diagnosis and the need for targeted intervention, especially considering that the first 95% has been  
254 achieved by Zambia. Anemia and health facility location were identified as factors significantly  
255 associated with AHD. These findings emphasize the urgent need for comprehensive care strategies  
256 that integrate routine anemia screening alongside HIV treatment. Additionally, the use of point-  
257 of-care diagnostics, such as the VISITECT® CD4 test, proved valuable for detecting AHD,  
258 particularly in resource-limited settings. The observed prevalence of AHD in patients with  
259 suppressed HIV viral loads warrants further investigation, as it may suggest underlying factors  
260 such as HIV elite control or "silent transfer". Further exploration into the immunology of elite HIV  
261 control and potential vaccine implications is needed.

## 262 **Funding Statement**

263 The study was funded by AIDS Healthcare Foundation (AHF). The content of this study is solely  
264 the responsibility of the authors and does not necessarily represent the official views of AHF.

## 265 **Authors Contributions**

266 Conceptualization: W.C., and C.C. Writing (original draft): W.C., C.C., and B.M.H. Writing  
267 (review and editing): W.C., C.C., B.M.H., L.S., R.L.M., M.K., E.M., and N.D. Visualization: W.C.  
268 Data collection: W.C., C.C., M.K., and E.M. Data analysis: W.C., C.C., B.M.H, and L.S.  
269 Supervision: C.C., and E.M. All authors have read and agreed to the published version of the  
270 manuscript.

## 271 **Conflict of Interest**

272 The authors declared no conflict of interest.

## 273 **Acknowledgment**

274 The authors take the opportunity to thank the AIDS Healthcare Foundation Zambia, Zambia  
275 Ministry of Health and Management of individual health facilities that enabled us to collect the  
276 data for this study.

## 277 **References**

- 278 1. Meintjes G, Kerkhoff AD, Burton R, Schutz C, Boulle A, Van Wyk G, et al. HIV-Related  
279 Medical Admissions to a South African District Hospital Remain Frequent Despite Effective  
280 Antiretroviral Therapy Scale-Up. *Medicine (Baltimore)* 2015;94:e2269.  
281 <https://doi.org/10.1097/MD.0000000000002269> PMID: [26683950](https://pubmed.ncbi.nlm.nih.gov/26683950/)
- 282 2. Musengimana G, Umugisha JP, Habinshuti P, Anderson T, Mukesharurema G, Remera E, et

- 283 al. Characteristics and clinical outcomes of patients presenting with advanced HIV disease  
284 in the “treat all” era: a retrospective cohort study from rural Rwanda. BMC Infect Dis  
285 2022;22:706. <https://doi.org/10.1186/s12879-022-07692-w> PMID: [36008786](https://pubmed.ncbi.nlm.nih.gov/36008786/)
- 286 3. World Health Organization. Advanced HIV disease. Geneva: World Health Organization;  
287 2024. [https://www.who.int/teams/global-hiv-hepatitis-and-stis-  
288 programmes/hiv/treatment/advanced-hiv-  
289 disease#:~:text=WHO%20defines%20advanced%20HIV%20disease,to%20have%20advanc  
290 ed%20HIV%20disease](https://www.who.int/teams/global-hiv-hepatitis-and-stis-programmes/hiv/treatment/advanced-hiv-disease#:~:text=WHO%20defines%20advanced%20HIV%20disease,to%20have%20advanced%20HIV%20disease) [cited 2024 Oct 10]
- 291 4. World Health Organization. Guidelines for managing advanced HIV disease and rapid  
292 initiation of antiretroviral therapy. Geneva: World Health Organization; 2017.  
293 <https://www.who.int/publications/i/item/9789241550062> [cited 2024 Oct 12]
- 294 5. Girum T, Yasin F, Wasie A, Shumbej T, Bekele F, Zeleke B. The effect of “universal test  
295 and treat” program on HIV treatment outcomes and patient survival among a cohort of  
296 adults taking antiretroviral treatment (ART) in low income settings of Gurage zone, South  
297 Ethiopia. AIDS Res Ther 2020;17:19. <https://doi.org/10.1186/s12981-020-00274-3> PMID:  
298 [32423457](https://pubmed.ncbi.nlm.nih.gov/32423457/)
- 299 6. Hamooya BM, Mutembo S, Muyunda B, Mweebo K, Kancheya N, Sikazwe L, et al. HIV  
300 test-and-treat policy improves clinical outcomes in Zambian adults from Southern Province:  
301 a multicenter retrospective cohort study. Front Public Health 2023;11:1244125.  
302 <https://doi.org/10.3389/fpubh.2023.1244125> PMID: [37900026](https://pubmed.ncbi.nlm.nih.gov/37900026/)
- 303 7. World Health Organization. Despite Remarkable Achievement in Tackling HIV/AIDS,  
304 Disease Remains ‘a Global Crisis, Causing a Death Every Minute’, Senior Official Tells  
305 General Assembly | Meetings Coverage and Press Releases 2023.

- 306 <https://press.un.org/en/2023/ga12509.doc.htm> [cited 2024 Oct 12]
- 307 8. World Health Organization. New WHO guidance on HIV viral suppression and scientific  
308 updates released at IAS 2023 2023. [https://www.who.int/news/item/23-07-2023-new-who-](https://www.who.int/news/item/23-07-2023-new-who-guidance-on-hiv-viral-suppression-and-scientific-updates-released-at-ias-2023)  
309 [guidance-on-hiv-viral-suppression-and-scientific-updates-released-at-ias-2023](https://www.who.int/news/item/23-07-2023-new-who-guidance-on-hiv-viral-suppression-and-scientific-updates-released-at-ias-2023) [cited 2024  
310 Oct 12]
- 311 9. Mounzer K, Brunet L, Fusco JS, Mcnicholl IR, Diaz Cuervo H, Sension M, et al. Advanced  
312 HIV Infection in Treatment-Naïve Individuals: Effectiveness and Persistence of  
313 Recommended 3-Drug Regimens. *Open Forum Infect Dis* 2022;9:ofac018.  
314 <https://doi.org/10.1093/ofid/ofac018> PMID: [35169590](https://pubmed.ncbi.nlm.nih.gov/35169590/)
- 315 10. Owachi D, Akatukunda P, Nanyanzi DS, Katwesigye R, Wanyina S, Muddu M, et al.  
316 Mortality and associated factors among people living with HIV admitted at a tertiary-care  
317 hospital in Uganda: a cross-sectional study. *BMC Infect Dis* 2024;24:239.  
318 <https://doi.org/10.1186/s12879-024-09112-7> PMID: [38388345](https://pubmed.ncbi.nlm.nih.gov/38388345/)
- 319 11. Baldeh M, Kizito S, Lakoh S, Sesay D, Williams SA, Barrie U, et al. Advanced HIV disease  
320 and associated factors among young people aged 15—24 years at a tertiary hospital in Sierra  
321 Leone: a cross-sectional study. *BMC Infect Dis* 2024;24:611.  
322 <https://doi.org/10.1186/s12879-024-09524-5> PMID: [38902606](https://pubmed.ncbi.nlm.nih.gov/38902606/)
- 323 12. Jiang H, Liu J, Tan Z, Fu X, Xie Y, Lin K, et al. Prevalence of and factors associated with  
324 advanced HIV disease among newly diagnosed people living with HIV in Guangdong  
325 Province, China. *J Int AIDS Soc* 2020;23:e25642. <https://doi.org/10.1002/jia2.25642> PMID:  
326 [33225623](https://pubmed.ncbi.nlm.nih.gov/33225623/)
- 327 13. Coul ELMO de, Sighem A van, Brinkman K, Benthem BH van, Ende ME van der,  
328 Geerlings S, et al. Factors associated with presenting late or with advanced HIV disease in

- 329 the Netherlands, 1996–2014: results from a national observational cohort. *BMJ Open*
- 330 2016;6:e009688. <https://doi.org/10.1136/bmjopen-2015-009688> PMID: [26729389](https://pubmed.ncbi.nlm.nih.gov/26729389/)
- 331 14. Okulicz JF, Lambotte O. Epidemiology and clinical characteristics of elite controllers. *Curr*
- 332 *Opin HIV AIDS* 2011;6:163. <https://doi.org/10.1097/COH.0b013e328344f35e> PMID:
- 333 [21502920](https://pubmed.ncbi.nlm.nih.gov/21502920/)
- 334 15. Nakalega R, Mukiza N, Debem H, Kiwanuka G, Kakumba RM, Menge R, et al. Linkage to
- 335 intensive adherence counselling among HIV-positive persons on ART with detectable viral
- 336 load in Gomba district, rural Uganda. *AIDS Res Ther* 2021;18:15.
- 337 <https://doi.org/10.1186/s12981-021-00349-9> PMID: [33879190](https://pubmed.ncbi.nlm.nih.gov/33879190/)
- 338 16. Luhembwe M, Ingwe R, Lulebo A, Nkamba D, Ditekemena J. Unsuppressed HIV Viral
- 339 Load and Related Factors in Patients Receiving Antiretroviral Treatment in Tanganyika
- 340 Province, Democratic Republic of Congo (DRC). *BioMed* 2024;4:338–49.
- 341 <https://doi.org/10.3390/biomed4030027>
- 342 17. Boyd AT, Oboho I, Paulin H, Ali H, Godfrey C, Date A, et al. Addressing advanced HIV
- 343 disease and mortality in global HIV programming. *AIDS Res Ther* 2020;17:40.
- 344 <https://doi.org/10.1186/s12981-020-00296-x> PMID: [32650797](https://pubmed.ncbi.nlm.nih.gov/32650797/)
- 345 18. Mirzazadeh A, Eshun-Wilson I, Thompson RR, Bonyani A, Kahn JG, Baral SD, et al.
- 346 Interventions to reengage people living with HIV who are lost to follow-up from HIV
- 347 treatment programs: A systematic review and meta-analysis. *PLOS Med* 2022;19:e1003940.
- 348 <https://doi.org/10.1371/journal.pmed.1003940> PMID: [35290369](https://pubmed.ncbi.nlm.nih.gov/35290369/)
- 349 19. Kitenge MK, Fatti G, Eshun-Wilson I, Aluko O, Nyasulu P. Prevalence and trends of
- 350 advanced HIV disease among antiretroviral therapy-naïve and antiretroviral therapy-
- 351 experienced patients in South Africa between 2010-2021: a systematic review and meta-

- 352 analysis. BMC Infect Dis 2023;23:549. <https://doi.org/10.1186/s12879-023-08521-4> PMID:  
353 [37608300](https://pubmed.ncbi.nlm.nih.gov/37608300/)
- 354 20. Trickey A, McGinnis K, Gill MJ, Abgrall S, Berenguer J, Wyen C, et al. Longitudinal trends  
355 in causes of death among adults with HIV on antiretroviral therapy in Europe and North  
356 America from 1996 to 2020: a collaboration of cohort studies. Lancet HIV 2024;11:e176–  
357 85. [https://doi.org/10.1016/S2352-3018\(23\)00272-2](https://doi.org/10.1016/S2352-3018(23)00272-2) PMID: [38280393](https://pubmed.ncbi.nlm.nih.gov/38280393/)
- 358 21. Auld AF, Shiraishi RW, Oboho I, Ross C, Bateganya M, Pelletier V, et al. Trends in  
359 Prevalence of Advanced HIV Disease at Antiretroviral Therapy Enrollment — 10 Countries,  
360 2004–2015. Morb Mortal Wkly Rep 2017;66:558–63.  
361 <https://doi.org/10.15585/mmwr.mm6621a3> PMID: [28570507](https://pubmed.ncbi.nlm.nih.gov/28570507/)
- 362 22. Ministry Of Health. Guidelines for Management of Advanced HIV Disease in Zambia.  
363 2021.
- 364 23. World Health Organization. Guideline on haemoglobin cutoffs to define anaemia in  
365 individuals and populations 2024. <https://www.who.int/publications/i/item/9789240088542>  
366 [cited 2024 Nov 9]
- 367 24. World Health Organization. The role of HIV viral suppression in improving individual  
368 health and reducing transmission 2023.  
369 <https://www.who.int/publications/i/item/9789240055179> [cited 2024 Nov 10]
- 370 25. World Health Organization. Consolidated guidelines on HIV prevention, testing, treatment,  
371 service delivery and monitoring: recommendations for a public health approach 2021.  
372 <https://www.who.int/publications/i/item/9789240031593> [cited 2024 Nov 10]
- 373 26. Ainembabazi B, Katana E, Bongomin F, Wanduru P, Mayega RW, Mukose AD. Prevalence  
374 of advanced HIV disease and associated factors among antiretroviral therapy naïve adults



- 375 enrolling in care at public health facilities in Kampala, Uganda. *Ther Adv Infect Dis*  
376 2024;11:20499361241251936. <https://doi.org/10.1177/20499361241251936> PMID:  
377 [38770168](https://pubmed.ncbi.nlm.nih.gov/38770168/)
- 378 27. Ik O, Al E, N D, Hn P, M I, E B, et al. Advanced HIV disease in East Africa and Nigeria, in  
379 The African Cohort Study. *J Acquir Immune Defic Syndr* 1999 2024;96.  
380 <https://doi.org/10.1097/QAI.0000000000003392> PMID: [38427929](https://pubmed.ncbi.nlm.nih.gov/38427929/)
- 381 28. UNAIDS. AIDS can be ended by 2030 - New UN report. *Afr Renew*. 2023. Available from:  
382 [https://www.un.org/africarenewal/magazine/july-2023/aids-can-be-ended-2030-new-un-](https://www.un.org/africarenewal/magazine/july-2023/aids-can-be-ended-2030-new-un-report)  
383 [report](https://www.un.org/africarenewal/magazine/july-2023/aids-can-be-ended-2030-new-un-report) [cited 2024 Nov 11]
- 384 29. UNAIDS. Global AIDS strategy 2021-2026: End inequalities. End AIDS. Geneva:  
385 UNAIDS; 2021. Available from: <https://coilink.org/20.500.12592/pnvx21z> [cited 2024 Sep  
386 10]
- 387 30. Ministry of Health. Zambia Population-based HIV Impact Assessment (ZAMPHIA) 2021.  
388 2022. Available from: [https://www.zamstats.gov.zm/wp-](https://www.zamstats.gov.zm/wp-content/uploads/2024/01/ZAMPHIA-2021-Final-Report.pdf)  
389 [content/uploads/2024/01/ZAMPHIA-2021-Final-Report.pdf](https://www.zamstats.gov.zm/wp-content/uploads/2024/01/ZAMPHIA-2021-Final-Report.pdf) [cited 2024 Sep 10]
- 390 31. Aemro A, Workneh BS, Mekonen EG, Wassie M, Chekol B. Prevalence of anaemia and its  
391 associated factors among HIV-infected adults at the time of ART initiation at Debre Markos  
392 Comprehensive Specialized Hospital, Northwest Ethiopia: a retrospective cross-sectional  
393 study. *BMJ Open* 2022;12:e057235. <https://doi.org/10.1136/bmjopen-2021-057235> PMID:  
394 [35725251](https://pubmed.ncbi.nlm.nih.gov/35725251/)
- 395 32. Redig AJ, Berliner N. Pathogenesis and clinical implications of HIV-related anemia in 2013.  
396 *Hematology* 2013;2013:377–81. <https://doi.org/10.1182/asheducation-2013.1.377> PMID:  
397 [24319207](https://pubmed.ncbi.nlm.nih.gov/24319207/)

- 398 33. Opie J, Verburgh E, Bailly J, Mayne E, Louw V. Hematological Complications of Human  
399 Immunodeficiency Virus (HIV) Infection: An Update From an HIV-Endemic Setting. Open  
400 Forum Infect Dis 2024;11:ofae162. <https://doi.org/10.1093/ofid/ofae162> PMID: [38601746](https://pubmed.ncbi.nlm.nih.gov/38601746/)
- 401 34. Aregay AD, Kidane KM, Aregay AB, Fenta KA, Woldegebriel AG, Godefay H, et al.  
402 Prediction of CD4 T-Lymphocyte Count Using WHO Clinical Staging among ART-Naïve  
403 HIV-Infected Adolescents and Adults in Northern Ethiopia: A Retrospective Study. AIDS  
404 Res Treat 2020;2020:2163486. <https://doi.org/10.1155/2020/2163486> PMID: [32411452](https://pubmed.ncbi.nlm.nih.gov/32411452/)
- 405 35. Munthali C, Taegtmeyer M, Garner PG, Lalloo DG, Squire SB, Corbett EL, et al. Diagnostic  
406 accuracy of the WHO clinical staging system for defining eligibility for ART in sub-Saharan  
407 Africa: a systematic review and meta-analysis. J Int AIDS Soc 2014;17:18932.  
408 <https://doi.org/10.7448/IAS.17.1.18932> PMID: [24929097](https://pubmed.ncbi.nlm.nih.gov/24929097/)
- 409 36. Kaplan SR, Oosthuizen C, Stinson K, Little F, Euvrard J, Schomaker M, et al.  
410 Contemporary disengagement from antiretroviral therapy in Khayelitsha, South Africa: A  
411 cohort study. PLOS Med 2017;14:e1002407. <https://doi.org/10.1371/journal.pmed.1002407>  
412 PMID: [29112692](https://pubmed.ncbi.nlm.nih.gov/29112692/)
- 413 37. Audi C, Jahanpour O, Antelman G, Guay L, Rutaihwa M, van de Ven R, et al. Facilitators  
414 and barriers to antiretroviral therapy adherence among HIV-positive adolescents living in  
415 Tanzania. BMC Public Health 2021;21:2274. <https://doi.org/10.1186/s12889-021-12323-1>  
416 PMID: [34903209](https://pubmed.ncbi.nlm.nih.gov/34903209/)
- 417 38. Society for Adolescent Health and Medicine. Improving Outcomes for Adolescents and  
418 Young Adults Living With HIV. J Adolesc Health. 2023;73:605–9.  
419 <https://doi.org/10.1016/j.jadohealth.2023.05.006> PMID: [37422741](https://pubmed.ncbi.nlm.nih.gov/37422741/)
- 420 39. Boufassa F, Lechenadec J, Meyer L, Costagliola D, Hunt PW, Pereyra F, et al. Blunted

- 421 Response to Combination Antiretroviral Therapy in HIV Elite Controllers: An International  
422 HIV Controller Collaboration. PLOS ONE 2014;9:e85516.  
423 <https://doi.org/10.1371/journal.pone.0085516> PMID: [24465584](https://pubmed.ncbi.nlm.nih.gov/24465584/)
- 424 40. Balachandra S, Rogers JH, Ruangtragool L, Radin E, Musuka G, Oboho I, et al. Concurrent  
425 advanced HIV disease and viral load suppression in a high-burden setting: Findings from the  
426 2015–6 ZIMPHIA survey. PLoS ONE 2020;15:e0230205.  
427 <https://doi.org/10.1371/journal.pone.0230205> PMID: [32584821](https://pubmed.ncbi.nlm.nih.gov/32584821/)
- 428 41. Elvstam O, Marrone G, Medstrand P, Treutiger CJ, Sönnnerborg A, Gisslén M, et al. All-  
429 Cause Mortality and Serious Non-AIDS Events in Adults With Low-level Human  
430 Immunodeficiency Virus Viremia During Combination Antiretroviral Therapy: Results  
431 From a Swedish Nationwide Observational Study. Clin Infect Dis Off Publ Infect Dis Soc  
432 Am 2020;72:2079–86. <https://doi.org/10.1093/cid/ciaa413> PMID: [32271361](https://pubmed.ncbi.nlm.nih.gov/32271361/)
- 433 42. Kamvuma K, Masenga S, Hamooya B, Chanda W, Munsaka S. Prevalence and factors  
434 associated with moderate-to-severe anaemia among virally suppressed people with HIV at a  
435 tertiary hospital in Zambia. PLOS ONE 2024;19:e0303734.  
436 <https://doi.org/10.1371/journal.pone.0303734> PMID: [39186572](https://pubmed.ncbi.nlm.nih.gov/39186572/)
